# Supplementary material for: Scientific Considerations for Evaluating Cancer Bioassays Conducted by the Ramazzini Institute
Source: PubMed Central journal article supplement (PMC3852791; doi:10.1289/ehp.1306661), 2013-09-17
Supplement: ehp.1306661.s001.508.pdf [file ehp.1306661.s001.508.pdf]

**Supplemental Material**  
**Scientific Considerations for Evaluating Cancer Bioassays Conducted by  
the Ramazzini Institute**

Jeffrey S. Gift, Jane C. Caldwell, Jennifer Jinot, Marina V. Evans, Ila Cote, and John J.  
Vandenberg

**Supplemental Material, Table S1. RI Control Group Rates for Lymphoma/Leukemia**

| Chemical                                            | Male Incidence | Male Rate         | Female Incidence | Female Rate       | Source                                                            |
|-----------------------------------------------------|----------------|-------------------|------------------|-------------------|-------------------------------------------------------------------|
| <b>1988-1989 publications</b>                       |                |                   |                  |                   |                                                                   |
| Vinyl chloride, Vinylidene chloride & Acrylonitrile |                |                   | 2/60             | 3.33              | (Cotti et al. 1988; Maltoni et al. 1988a; Maltoni and Cotti 1988) |
| Vinyl chloride, Vinylidene chloride & Acrylonitrile | 12/158         | 7.59              | 1/149            | 0.67              | (Cotti et al. 1988; Maltoni et al. 1988a; Maltoni and Cotti 1988) |
| Styrene (inhal)                                     | 3/60           | 5.00              | 3/60             | 5.00              | (Conti et al. 1988)                                               |
| Styrene (gavage)                                    | 0/40           | 0.00              | 1/40             | 2.50              | (Conti et al. 1988)                                               |
| Styrene (ip)                                        | 3/40           | 7.50              | 0/40             | 0.00              | (Conti et al. 1988)                                               |
| Styrene (sc)                                        | 1/40           | 2.50              | 1/40             | 2.50              | (Conti et al. 1988)                                               |
| Styrene oxide (gavage)                              | 2/40           | 5.00              | 1/40             | 2.50              | (Conti et al. 1988)                                               |
| p-Methylstyrene                                     | 2/30           | 6.67              | 2/30             | 6.67              | (Conti et al. 1988)                                               |
| p-Methylstyrene                                     | 4/60           | 6.67              | 14/60            | 23.33             | (Conti et al. 1988)                                               |
| Propylene(inhal)                                    | 2/120          | 1.67              | 4/120            | 3.33              | (Ciliberti et al. 1988)                                           |
| FC11 & FC12                                         | 9/150          | 6.00              | 8/150            | 5.33              | (Maltoni et al. 1988d)                                            |
| FC22                                                | 5/60           | 8.33              | 1/60             | 1.67              | (Maltoni et al. 1988d)                                            |
| Trichloroethylene (8 wk)                            | 17/90          | 18.89             | 8/90             | 8.89              | (Maltoni et al. 1988c)                                            |
| Trichloroethylene (104 wk)                          | 9/135          | 6.67              | 7/145            | 4.83              | (Maltoni et al. 1988c)                                            |
| Acrylonitrile (BT 203)                              | 4/75           | 5.30              | 3/75             | 4.00              | (Maltoni et al. 1988a)                                            |
| Acrylonitrile (BT 201)                              | 0/30           | 0.00              | 0/30             | 0.00              | (Maltoni et al. 1988a)                                            |
| Methylene chloride (olive oil)                      | 3/50           | 6.00              | 1/50             | 2.00              | (Maltoni et al. 1988b)                                            |
| Methylene chloride (none)                           | 2/20           | 10.00             | 0/26             | 0.00              | (Maltoni et al. 1988b)                                            |
| Zeolites (ip)                                       | 3/20           | 15.00             | 2/20             | 10.00             | (Maltoni and Minardi 1988)                                        |
| Benzene (BT 901)                                    | 0/30           | 0.00              | 1/30             | 3.33              | (Maltoni et al. 1989)                                             |
| Benzene (BT 902)                                    | 3/50           | 6.00              | 1/50             | 2.00              | (Maltoni et al. 1989)                                             |
| Formaldehyde                                        | 8/100          | 8.00              | 7/100            | 7.00              | (Soffritti et al. 1989; Soffritti et al. 2002b)                   |
| <b>Overall mean (95% CI) <sup>a</sup></b>           |                | 5.9 (4.1, 7.9)    |                  | 4.5 (3.1, 6.1)    |                                                                   |
| <b>1995-1999 publications</b>                       |                |                   |                  |                   |                                                                   |
| MTBE                                                | 10/60          | 16.67             | 2/60             | 3.30              | (Belpoggi et al. 1995; Belpoggi et al. 1997)                      |
| Chlorine                                            | 4/50           | 8.00              | 0/50             | 0.00              | (Soffritti et al. 1997)                                           |
| Toluene & Xylene                                    | 5/50           | 10.00             | 3/50             | 6.00              | (Maltoni et al. 1997)                                             |
| Toluene & Xylene                                    | 3/50           | 6.00              | 1/50             | 2.00              | (Maltoni et al. 1997)                                             |
| Tamoxifen                                           | 14/100         | 14.00             | 9/100            | 9.00              | (Maltoni et al. 1997)                                             |
| Tamoxifen                                           |                |                   | 13/150           | 8.67              | (Maltoni et al. 1997)                                             |
| Tamoxifen                                           |                |                   | 12/139           | 8.63              | (Maltoni et al. 1997)                                             |
| ETBE                                                | 3/60           | 5.00              | 3/60             | 5.00              | (Belpoggi et al. 1999)                                            |
| <b>Overall mean (95% CI) <sup>a</sup></b>           |                | 10.5 (7.1, 14.4)  |                  | 6.0 (3.8, 8.7)    |                                                                   |
| <b>2002-2006 publications</b>                       |                |                   |                  |                   |                                                                   |
| Methanol                                            | 28/100         | 28.00             | 13/100           | 13.00             | (Soffritti et al. 2002a)                                          |
| Ethanol breeders                                    | 35/110         | 31.82             | 17/110           | 15.45             | (Soffritti et al. 2002a)                                          |
| Ethanol offspring                                   | 8/49           | 16.33             | 39/277           | 14.08             | (Soffritti et al. 2002a)                                          |
| Acetaldehyde                                        | 6/50           | 12.00             | 2/50             | 4.00              | (Soffritti et al. 2002b)                                          |
| TAME& DIPE                                          | 17/100         | 17.00             | 7/100            | 7.00              | (Belpoggi et al. 2002b)                                           |
| Mancozeb                                            | 16/75          | 21.30             | 11/75            | 14.67             | (Belpoggi et al. 2002a)                                           |
| Vinyl acetate breeders                              | 0/14           | 0.00              | 8/37             | 21.62             | (Minardi et al. 2002)                                             |
| Vinyl acetate offspring                             | 13/107         | 12.15             | 11/99            | 11.11             | (Minardi et al. 2002)                                             |
| Aspartame                                           | 31/150         | 20.67             | 13/150           | 8.67              | (Soffritti et al. 2005; Soffritti et al. 2006)                    |
| Coca-Cola breeders                                  | 51/235         | 13.19             | 11/55            | 20.00             | (Belpoggi et al. 2006)                                            |
| Coca-Cola offspring                                 | 62/291         | 21.31             | 39/277           | 14.08             | (Belpoggi et al. 2006)                                            |
| <b>Overall mean (95% CI) <sup>a</sup></b>           |                | 20.0 (16.4, 23.8) |                  | 12.7 (10.4, 15.3) |                                                                   |

Source: Adapted from Roderick and Turnbull (2007)

<sup>a</sup> Overall mean estimates assume arc sin transformation of incidence is normally distributed across historical controls. The method of moments was applied to transformed rates to calculate the overall mean, SE, and confidence limits using 1.96 as the multiple of the SE (Hayes 2001). These estimates were then transformed back to rates.

## References

- Belpoggi F, Soffritti M, Maltoni C. 1995. Methyl-tertiary-butyl ether (MTBE)--a gasoline additive-- causes testicular and lymphohaematopoietic cancers in rats. *Toxicol Ind Health* 11:119-149.
- Belpoggi F, Soffritti M, Filippini F, Maltoni C, eds. 1997. Results of long-term experimental studies on the carcinogenicity of methyl tert-butyl ether. *Ann. N. Y.:Acad. Sci*, 77-95.
- Belpoggi F, Soffritti M, Maltoni C. 1999. Immunoblastic lymphomas in Sprague-Dawley rats following exposure to the gasoline oxygenated additives Methyl-Tertiary-Butyl Ether (MTBE) and Ethyl-Tertiary-Butyl Ether (ETBE): early observations on their natural history. *Eur J Oncol* 4:563-572.
- Belpoggi F, Soffritti M, Guarino M, Lambertini L, Cevolani D, Maltoni C. 2002a. Results of long-term experimental studies on the carcinogenicity of Ethylene-bis-Dithiocarbamate (Mancozeb) in rats. *Ann N Y Acad Sci* 982:123-136.
- Belpoggi F, Soffritti M, Minardi F, Bua L, Cattin E, Maltoni C. 2002b. Results of long-term carcinogenicity bioassays on tert-amyl-methyl-ether (TAME) and di-isopropyl-ether (DIPE) in rats. *Ann N Y Acad Sci* 982:70-86.
- Belpoggi F, Soffritti M, Tibaldi E, Falcioni L, Bua L, Trabucco F. 2006. Results of long-term carcinogenicity bioassays on Coca-Cola administered to Sprague-Dawley rats. *Ann N Y Acad Sci* 1076:736-752.
- Ciliberti A, Maltoni C, Perino G. 1988. Long-term carcinogenicity bioassays on propylene administered by inhalation to Sprague-Dawley rats and Swiss mice. *Ann N Y Acad Sci* 534:235-245.
- Conti B, Maltoni C, Perino G, Ciliberti A. 1988. Long-term carcinogenicity bioassays on styrene administered by inhalation, ingestion and injection and styrene oxide administered by ingestion in Sprague-Dawley rats, and para-methylstyrene administered by ingestion in Sprague-Dawley rats and Swiss mice. *Ann N Y Acad Sci* 534(1 Living in a C):203-234.
- Cotti G, Maltoni C, Lefemine G. 1988. Long-term carcinogenicity bioassay on vinylidene chloride administered by inhalation to Sprague-Dawley rats. New results. *Ann N Y Acad Sci* 534:160-168.
- Hayes AW. 2001. Principles and methods of toxicology. 4 ed. Philadelphia, PA:Taylor and Francis.
- Maltoni C, Ciliberti A, Cotti G, Perino G. 1988a. Long-term carcinogenicity bioassays on acrylonitrile administered by inhalation and by ingestion to Sprague-Dawley rats. *Ann N Y Acad Sci* 534:179-202.
- Maltoni C, Cotti G. 1988. Carcinogenicity of vinyl chloride in Sprague-Dawley rats after prenatal and postnatal exposure. *Ann N Y Acad Sci* 534:145-159.
- Maltoni C, Cotti G, Perino G. 1988b. Long-term carcinogenicity bioassays on methylene chloride administered by ingestion to Sprague-Dawley rats and Swiss mice and by inhalation to Sprague-Dawley rats. *Ann N Y Acad Sci* 534:352-366.

- Maltoni C, Lefemine G, Cotti G, Perino G. 1988c. Long-term carcinogenicity bioassays on trichloroethylene administered by inhalation to Sprague-Dawley rats and Swiss and B6C3F1 mice. *Ann N Y Acad Sci* 534:316-342.
- Maltoni C, Lefemine G, Tovoli D, Perino G. 1988d. Long-term carcinogenicity bioassays on three chlorofluorocarbons (trichlorofluoromethane, FC11; dichlorodifluoromethane, FC12; chlorodifluoromethane, FC22) administered by inhalation to Sprague-Dawley rats and Swiss mice. *Ann N Y Acad Sci* 534:261-282.
- Maltoni C, Minardi F. 1988. First available results of long-term carcinogenicity bioassay on detergency zeolites (MS 4A and MS 5A). *Ann N Y Acad Sci* 534:978-985.
- Maltoni C, Ciliberti A, Cotti G, Conti B, Belpoggi F. 1989. Benzene, an experimental multipotential carcinogen: Results of the long-term bioassays performed at the Bologna Institute of Oncology. *Environ Health Perspect* 82:109-124.
- Maltoni C, Ciliberti A, Pinto C, Soffritti M, Belpoggi F, Menarini L. 1997. Results of long-term experimental carcinogenicity studies of the effects of gasoline, correlated fuels, and major gasoline aromatics on rats. *Ann N Y Acad Sci* 837(1):15-52.
- Minardi F, Belpoggi F, Soffritti M, Ciliberti A, Lauriola M, Cattin E, et al. 2002. Results of long-term carcinogenicity bioassay on vinyl acetate monomer in Sprague-Dawley rats. *Ann N Y Acad Sci* 982:106-122.
- Rodricks JV, Turnbull D. 2007. Evaluation of quality of carcinogenicity studies conducted by the Ramazzini Foundation. Arlington, VA:ENVIRON International Corporation.
- Soffritti M, Maltoni C, Maffei F, Biagi R. 1989. Formaldehyde: an experimental multipotential carcinogen. *5:699-730*.
- Soffritti M, Belpoggi F, Lenzi A, Maltoni C. 1997. Results of long-term carcinogenicity studies of chlorine in rats. *Ann N Y Acad Sci* 837:189-208.
- Soffritti M, Belpoggi F, Cevolani D, Guarino M, Padovani M, Maltoni C, eds. 2002a. Results of long-term experimental studies on the carcinogenicity of methyl alcohol and ethyl alcohol in rats. Bologna, Italy:Ann. N. Y. Acad. Sci., 46-69.
- Soffritti M, Belpoggi F, Lambertin L, Lauriola M, Padovani M, Maltoni C. 2002b. Results of long-term experimental studies on the carcinogenicity of formaldehyde. *Ann N Y Acad Sci* 982:87-105.
- Soffritti M, Belpoggi F, Esposti DD, Lambertini L. 2005. Aspartame induces lymphomas and leukaemias in rats. *Eur J Oncol* 10:107-116.
- Soffritti M, Belpoggi F, Degli Esposti D, Lambertini L, Tibaldi T, Rigano A. 2006. First experimental demonstration of the multipotential carcinogenic effects of aspartame administered in the feed to Sprague-Dawley rats. *Environ Health Perspect* 114:379-385.
